# Supplementary material for: Modeling Climate Change Impacts on Wheat Productivity and Evaluating Adaptive Strategies Using DSSAT-CERES in Nepal’s Central Terai Region of Nepal
Source: Research Square preprint supplement (doi:10.21203/rs.3.rs-8733707/v1), 2026-02-03
Supplement: Supplementary file 1 [file b4265e91b6959f6ecd4ba210.docx]

|  | 2018/19 | | | 2019/20 | | | 2020/21 | | | 2021/22 | | |
| --- | --- | --- | --- | --- | --- | --- | --- | --- | --- | --- | --- | --- |
|  |  | Temp. (˚C) | |  | Temp. (˚C) | |  | Temp. (˚C) | |  | Temp.(˚C) | |
| Month | SRAD | Tmax | Tmin | SRAD | Tmax | Tmin | SRAD | Tmax | Tmin | SRAD | Tmax | Tmin |
| Nov | 15.3 | 26.2 | 24.0 | 14.8 | 33.1 | 12.6 | 15.6 | 31.9 | 14.0 | 15.3 | 26.2 | 24.0 |
| Dec | 13.1 | 31.4 | 23.3 | 13.2 | 32.1 | 10.0 | 13.6 | 33.3 | 9.6 | 13.1 | 31.4 | 23.3 |
| Jan | 13.2 | 35.1 | 9.2 | 11.9 | 33.6 | 10.0 | 14.6 | 33.9 | 24.3 | 13.2 | 35.1 | 9.2 |
| Feb | 15.5 | 36.9 | 11.8 | 15.3 | 32.4 | 11.9 | 16.2 | 34.4 | 18.3 | 11.7 | 37.6 | 24.7 |
| Mar | 21.1 | 36.8 | 14.8 | 19.6 | 33.3 | 16.2 | 20.9 | 34.1 | 13.1 | 16.7 | 34.5 | 20.5 |
| Apr | 19.1 | 32.2 | 19.7 | 20.7 | 29.1 | 20.0 | 19.6 | 33.6 | 8.0 | 19.8 | 33.8 | 14.4 |
| May | 23.5 | 32.6 | 22.5 | 18.9 | 24.6 | 22.1 | 19.6 | 33.4 | 8.9 | 23.3 | 32.7 | 11.0 |
| Jun | 20.1 | 26.2 | 19.3 | 16.5 | 25.7 | 18.8 | 18.3 | 33.1 | 12.1 | 18.8 | 33.8 | 9.0 |
| Jul | 15.1 | 26.7 | 24.6 | 13.7 | 27.7 | 25.9 | 16.0 | 31.7 | 15.4 | 18.2 | 32.1 | 11.3 |
| Aug | 18.0 | 30.8 | 26.3 | 16.4 | 33.3 | 25.7 | 15.7 | 28.0 | 22.3 | 14.0 | 32.1 | 16.6 |
| Sep | 13.5 | 32.5 | 25.0 | 14.1 | 35.1 | 25.1 | 16.8 | 25.8 | 22.9 | 17.8 | 28.8 | 20.2 |
| Oct | 16.3 | 33.4 | 21.0 | 18.3 | 33.0 | 20.5 | 17.8 | 26.7 | 23.5 | 13.4 | 24.8 | 21.5 |

Table Showing Average monthly climatic Parameters in cropping duration from 2018 to 2022.

Table Showing Soil physical and chemical properties of the experimental fields.

| Depth  (cm) | Clay  (%) | Silt  (%) | Saturated  Water content | Organic Carbons  (%) | pH in Water | Bulk Density  (g/cm3) | Hydraulic  Conduct  (cm/hr.) | Root growth factor (0-1) |
| --- | --- | --- | --- | --- | --- | --- | --- | --- |
| 0-20 | 12 | 52.1 | 0.556 | 1.0 | 6 | 1.4 | 1.62 | 0.99 |
| 21-40 | 25.4 | 41.8 | 0.471 | 0.85 | 6.9 | 1.42 | 1.32 | 0.95 |
| 41-60 | 28.8 | 39.7 | 0.461 | 0.65 | 6.9 | 1.43 | 0.63 | 0.54 |
| 61-80 | 29.3 | 38.9 | 0.455 | 0.46 | 6.9 | 1.45 | 0.25 | 0.44 |
| 81-100 | 28.8 | 38.6 | 0.452 | 0.41 | 7 | 1.45 | 0.23 | 0.24 |
| 101-120 | 28.6 | 38.6 | 0.421 | 0.37 | 7 | 1.55 | 0.23 | 0.11 |
